# Supplementary material for: Diurnal biting of malaria mosquitoes in the Central African Republic indicates residual transmission may be “out of control”
Source: PubMed Central journal article supplement — Proc Natl Acad Sci U S A. 2022 May 16;119(21):e2104282119. doi: 10.1073/pnas.2104282119 (PMC9173762; doi:10.1073/pnas.2104282119), 2022-05-16
Supplement: pnas.2104282119.sapp.pdf [file pnas.2104282119.sapp.pdf]

# PNAS

[www.pnas.org](http://www.pnas.org)

## **Supplementary Information for**

**Diurnal biting of malaria mosquitoes in the Central African Republic indicates residual transmission may be 'out of control'**

Claire Sangbakembi-Ngounou, Carlo Costantini, Neil Michel Longo-Pendy, Carine Ngoagouni, Ousman Akone-Ella, Nil Rahola, Sylvie Cornelie, Pierre Kengne, Emmanuel Rivalyn Nakouné, Narcisse Patrice Komas, and Diego Ayala

Corresponding author

Email: [diego.ayala@ird.fr](mailto:diego.ayala@ird.fr) [carlo.costantini@ird.fr](mailto:carlo.costantini@ird.fr)

### **This PDF file includes:**

Figures S1 to S6  
Tables S1 to S12

Legends for Datasets S1  
SI References

### **Other supplementary materials for this manuscript include the following:**

Datasets S1

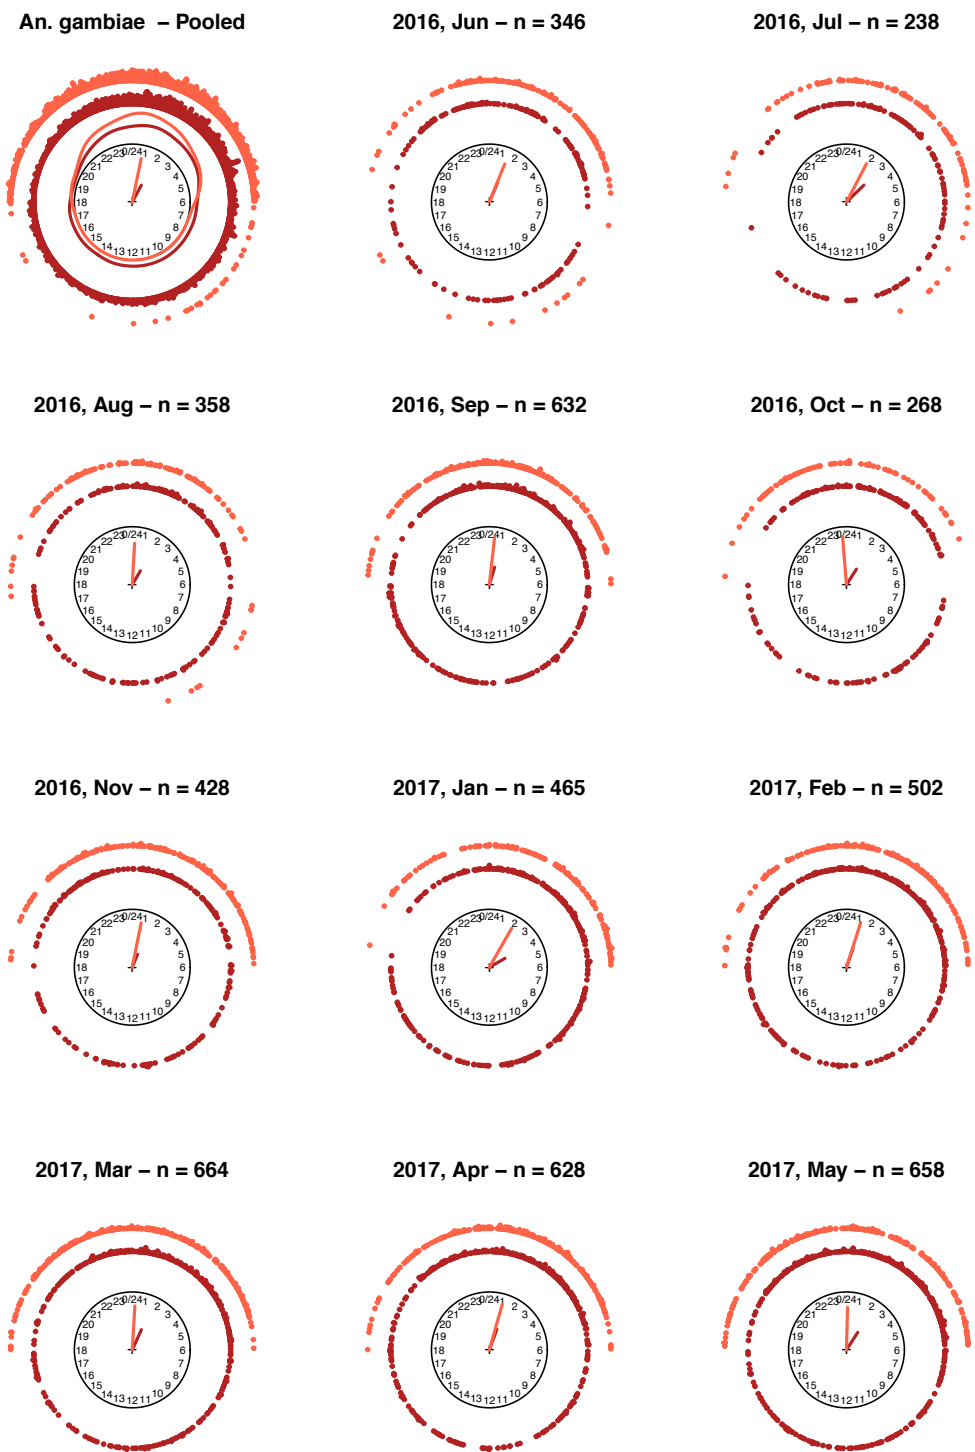

**Fig. S1.** Circular representation of monthly biting events of *Anopheles gambiae* across the collection period. Darker colors represent indoor collections, and lighter colors outdoor collections. “n” indicates the number of biting events across the four sites in Bangui.

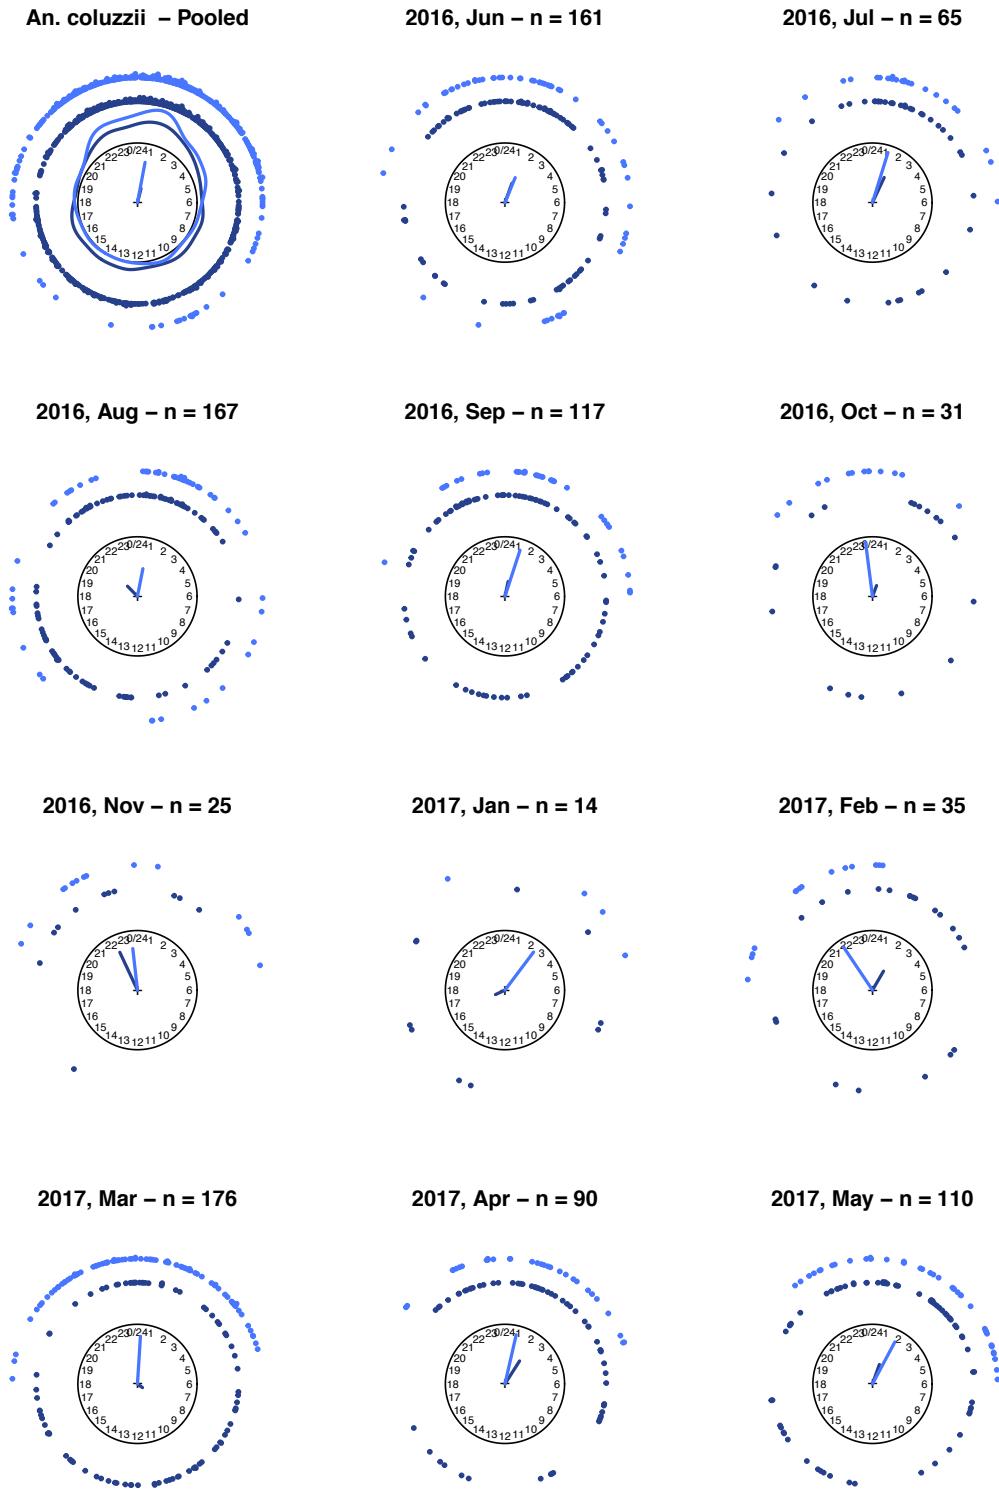

**Fig. S2.** Circular representation of monthly biting events of *Anopheles coluzzii* across the collection period. Darker colors represent indoor collections, and lighter colors outdoor collections. “n” indicates the number of biting events across the four sites in Bangui.

**An. funestus – Pooled**

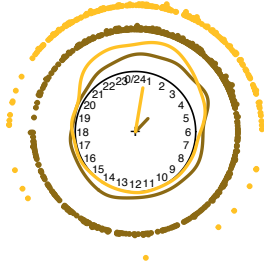

**2016, Jun – n = 33**

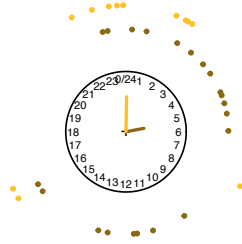

**2016, Jul – n = 72**

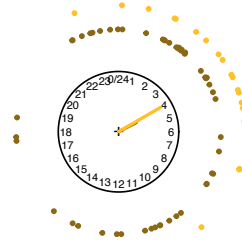

**2016, Aug – n = 95**

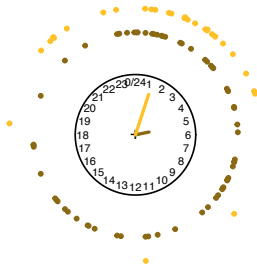

**2016, Sep – n = 224**

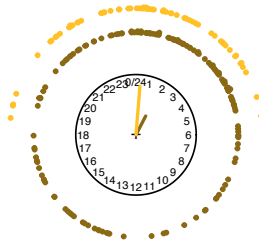

**2016, Oct – n = 118**

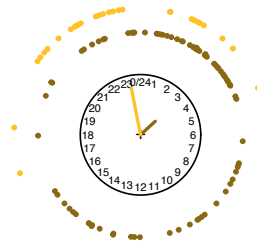

**2016, Nov – n = 147**

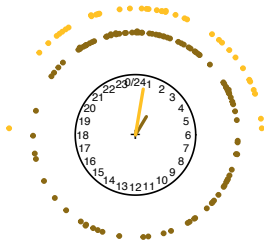

**2017, Jan – n = 37**

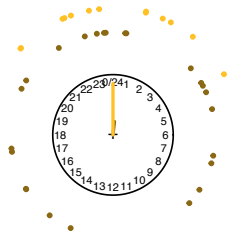

**2017, Feb – n = 4**

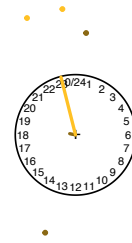

**2017, Mar – n = 11**

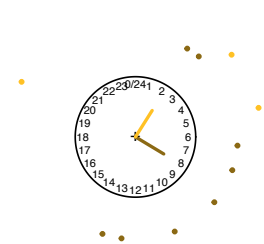

**2017, Apr – n = 13**

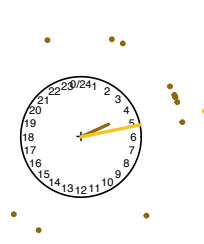

**2017, May – n = 20**

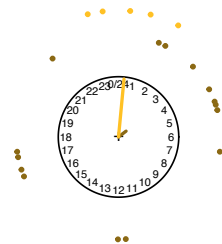

**Fig. S3.** Circular representation of monthly biting events of *Anopheles funestus* across the collection period. Darker colors represent indoor collections, and lighter colors outdoor collections. “n” indicates the number of biting events across the four sites in Bangui.

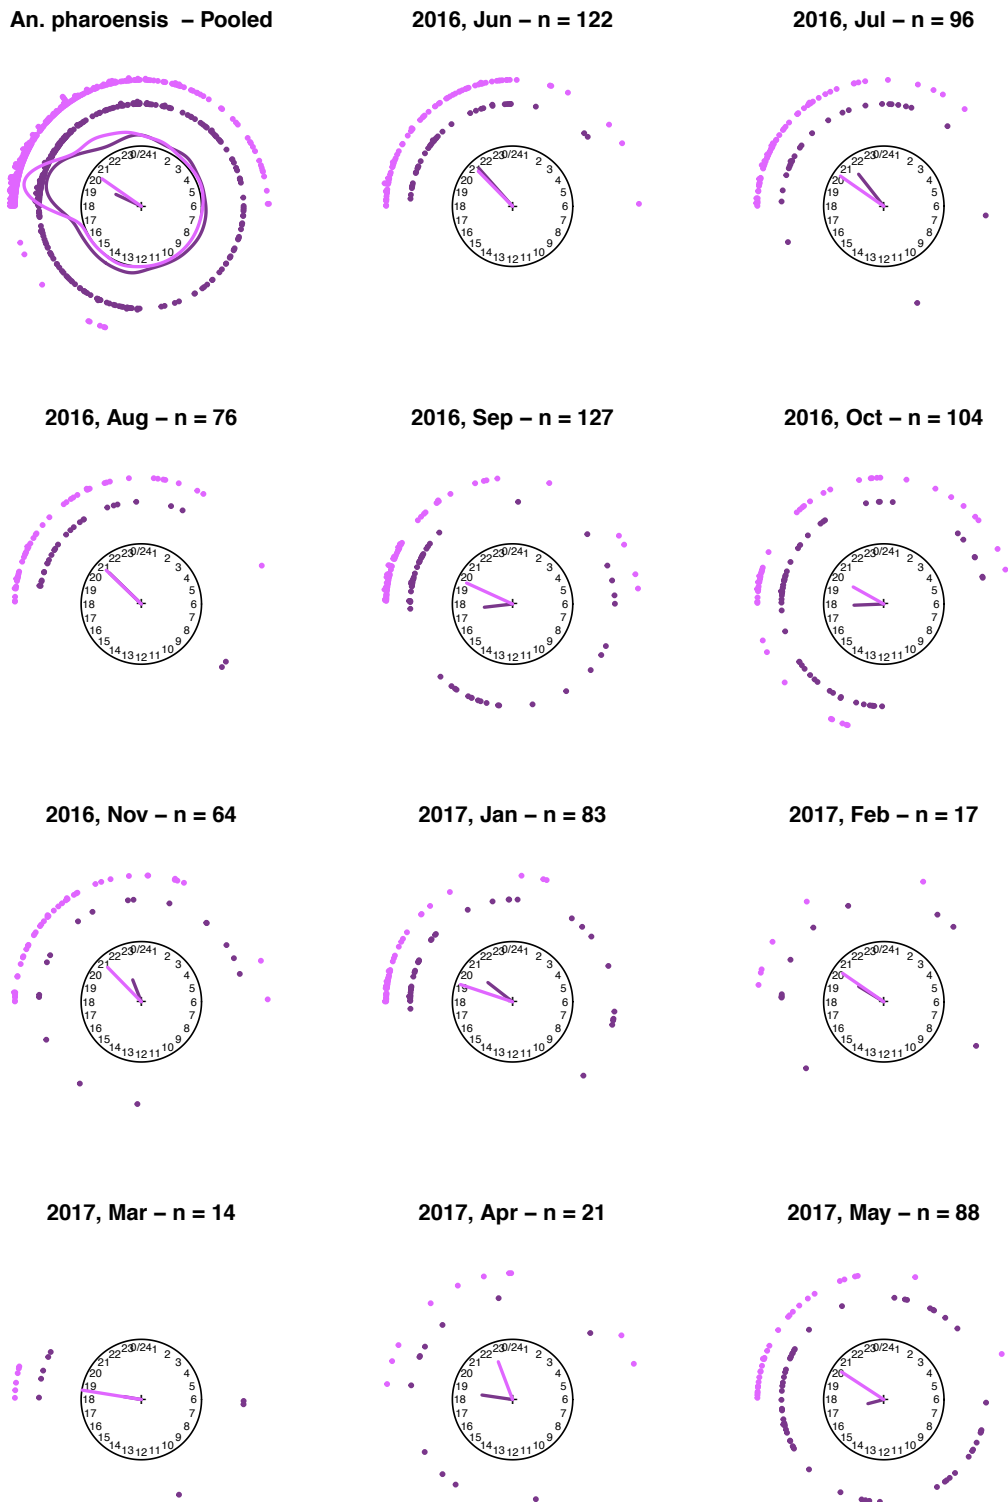

**Fig. S4.** Circular representation of monthly biting events of *Anopheles pharoensis* across the collection period. Darker colors represent indoor collections, and lighter colors outdoor collections. “n” indicates the number of biting events across the four sites in Bangui.

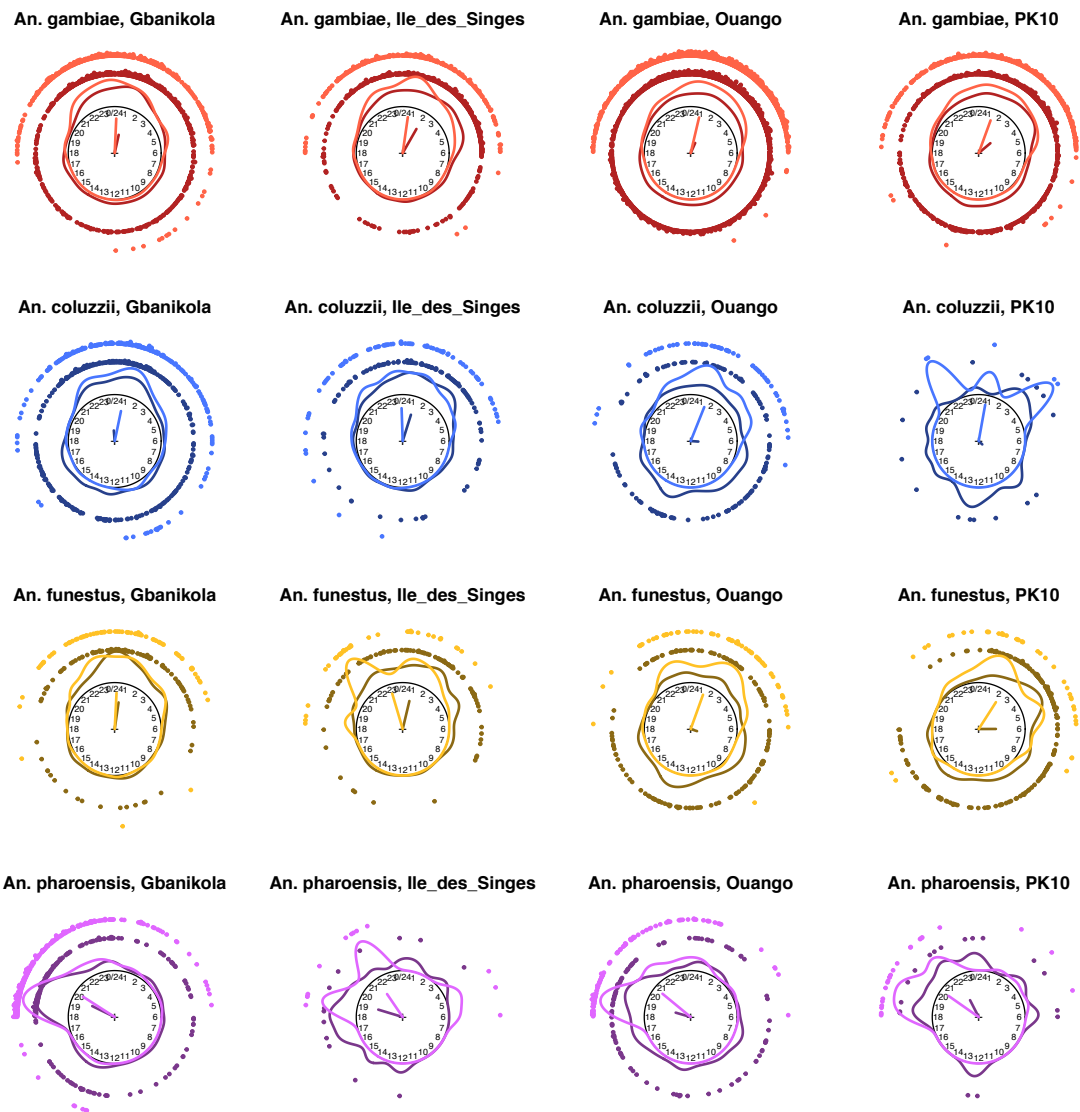

**Fig. S5.** Circular representation of biting events of *Anopheles pharoensis* across the collection sites in Bangui. Darker colors represent indoor collections, and lighter colors outdoor collections. “Each dot is a biting event.”

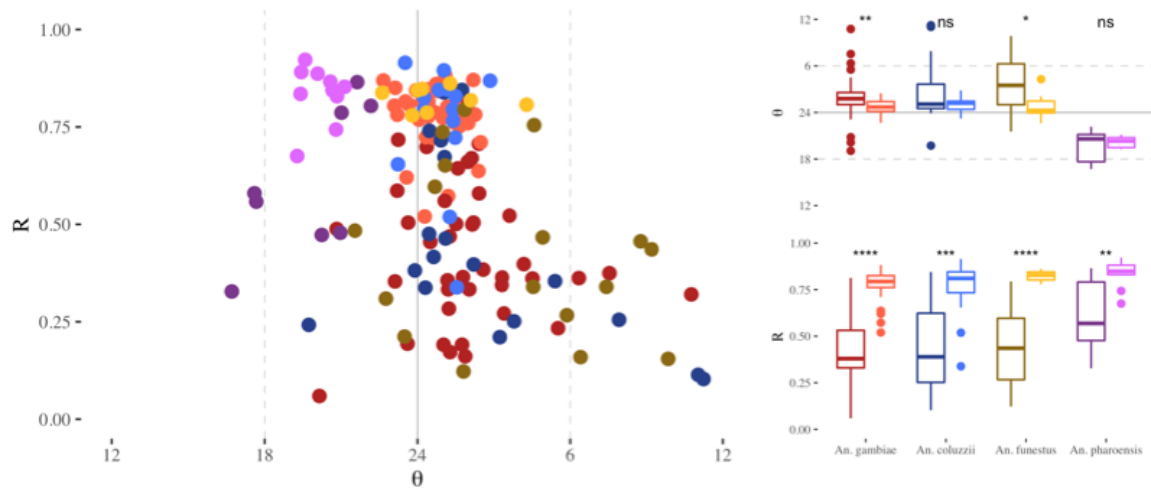

**Fig. S6.** Bivariate distribution of monthly estimates of sample mean ( $\theta$ ) and resultant lengths ( $R$ ) of biting events. Each symbol represents a sample from one month and one site for each species and location (indoors darker colors, outdoors lighter colors). *Anopheles gambiae* (red), *A. coluzzii* (blue), *A. funestus* (yellow), *A. pharoensis* (violet). Mean directions are expressed in hours, with 0/24 indicating midnight; dashed lines at 6/18 delimit nighttime, from sunset (18h) to sunrise (6h). Boxplots represent the median, interquartile interval and range for each species and location. Significance was calculated using the Wilcoxon test for multiple mean comparisons  $\theta$  (top-right) and  $R$  (bottom-right). Significant values are indicated by asterisks (ns: not significant, \*\*\* < 0.001, \*\* < 0.01, \* < 0.05, after Bonferroni correction).

**Table S1.** Summary of circular statistics for each species, location and month.

| Species      | Location | YearMonth | n   | $\theta$ | $\theta_{low}$ | $\theta_{upp}$ | R    | R.low | R.upp | b2    | b2.lo<br>w | b2.up<br>p | a2    | a2.low | a2.upp |
|--------------|----------|-----------|-----|----------|----------------|----------------|------|-------|-------|-------|------------|------------|-------|--------|--------|
| An. coluzzii | Indoors  | 2016-06   | 101 | 1.33     | 0.98           | 1.68           | 0.34 | 0.20  | 0.48  | 0.15  | -0.05      | 0.34       | 0.25  | 0.06   | 0.44   |
| An. coluzzii | Indoors  | 2016-07   | 40  | 1.68     | 1.32           | 2.04           | 0.46 | 0.24  | 0.68  | 0.15  | -0.19      | 0.48       | 0.45  | 0.19   | 0.71   |
| An. coluzzii | Indoors  | 2016-08   | 108 | -2.98    | -3.59          | -2.37          | 0.23 | 0.12  | 0.34  | -0.61 | -0.92      | -0.30      | -0.24 | -0.61  | 0.13   |
| An. coluzzii | Indoors  | 2016-09   | 83  | 0.83     | 0.29           | 1.36           | 0.25 | 0.09  | 0.40  | 0.03  | -0.20      | 0.25       | 0.22  | -0.07  | 0.51   |
| An. coluzzii | Indoors  | 2016-10   | 18  | 1.36     | -0.12          | 2.83           | 0.14 | -0.21 | 0.49  | 0.50  | -0.21      | 1.21       | 0.47  | 0.07   | 0.88   |
| An. coluzzii | Indoors  | 2016-11   | 11  | -1.68    | -2.18          | -1.18          | 0.68 | 0.44  | 0.91  | -0.12 | -0.43      | 0.20       | 0.26  | -0.10  | 0.63   |
| An. coluzzii | Indoors  | 2017-01   | 10  | -7.84    | -10.05         | -5.62          | 0.06 | -0.40 | 0.53  | 3.69  | 2.71       | 4.67       | 0.68  | 0.20   | 1.17   |
| An. coluzzii | Indoors  | 2017-02   | 21  | 2.03     | 1.35           | 2.71           | 0.35 | 0.04  | 0.66  | -0.02 | -0.50      | 0.46       | 0.39  | 0.06   | 0.72   |
| An. coluzzii | Indoors  | 2017-03   | 78  | 11.30    | 10.44          | 12.15          | 0.15 | -0.02 | 0.32  | 0.11  | -0.18      | 0.39       | 0.23  | 0.07   | 0.39   |
| An. coluzzii | Indoors  | 2017-04   | 70  | 2.22     | 1.94           | 2.50           | 0.51 | 0.37  | 0.65  | 0.12  | 0.00       | 0.24       | 0.22  | 0.04   | 0.40   |
| An. coluzzii | Indoors  | 2017-05   | 69  | 1.30     | 0.88           | 1.73           | 0.34 | 0.17  | 0.50  | -0.05 | -0.26      | 0.16       | 0.24  | 0.07   | 0.40   |
| An. coluzzii | Outdoors | 2016-06   | 60  | 1.50     | 1.15           | 1.85           | 0.45 | 0.29  | 0.61  | 0.32  | 0.15       | 0.49       | 0.22  | -0.09  | 0.53   |
| An. coluzzii | Outdoors | 2016-07   | 25  | 1.15     | 0.95           | 1.34           | 0.87 | 0.80  | 0.95  | 0.03  | -0.05      | 0.12       | 0.61  | 0.39   | 0.83   |
| An. coluzzii | Outdoors | 2016-08   | 59  | 0.74     | 0.43           | 1.05           | 0.47 | 0.30  | 0.64  | -0.05 | -0.30      | 0.20       | 0.36  | 0.18   | 0.55   |
| An. coluzzii | Outdoors | 2016-09   | 34  | 1.20     | 0.99           | 1.42           | 0.81 | 0.73  | 0.89  | 0.03  | -0.06      | 0.13       | 0.43  | 0.22   | 0.64   |
| An. coluzzii | Outdoors | 2016-10   | 13  | -0.49    | -0.71          | -0.27          | 0.91 | 0.85  | 0.98  | 0.01  | -0.05      | 0.06       | 0.70  | 0.50   | 0.91   |
| An. coluzzii | Outdoors | 2016-11   | 14  | -0.41    | -0.90          | 0.08           | 0.68 | 0.53  | 0.83  | 0.28  | 0.06       | 0.50       | 0.09  | -0.42  | 0.60   |
| An. coluzzii | Outdoors | 2017-01   | 4   | 2.42     | 1.74           | 3.11           | 0.75 | 0.53  | 0.97  | -0.33 | -0.47      | -0.19      | 0.27  | -0.56  | 1.09   |
| An. coluzzii | Outdoors | 2017-02   | 14  | -2.26    | -2.55          | -1.97          | 0.86 | 0.80  | 0.92  | -0.05 | -0.14      | 0.04       | 0.50  | 0.29   | 0.71   |
| An. coluzzii | Outdoors | 2017-03   | 70  | -0.29    | -0.45          | -0.12          | 0.80 | 0.75  | 0.85  | 0.05  | -0.02      | 0.12       | 0.37  | 0.22   | 0.51   |
| An. coluzzii | Outdoors | 2017-04   | 48  | 1.34     | 1.19           | 1.49           | 0.86 | 0.82  | 0.91  | -0.02 | -0.07      | 0.03       | 0.56  | 0.41   | 0.70   |
| An. coluzzii | Outdoors | 2017-05   | 41  | 1.87     | 1.65           | 2.09           | 0.79 | 0.74  | 0.85  | -0.03 | -0.13      | 0.07       | 0.32  | 0.16   | 0.48   |
| An. funestus | Indoors  | 2016-06   | 21  | 5.38     | 4.36           | 6.40           | 0.26 | 0.00  | 0.53  | 0.80  | 0.55       | 1.05       | -0.05 | -0.90  | 0.81   |
| An. funestus | Indoors  | 2016-07   | 52  | 4.20     | 3.62           | 4.78           | 0.32 | 0.15  | 0.49  | 0.32  | 0.14       | 0.50       | -0.03 | -0.41  | 0.35   |



| Species      | Location | YearMonth | n   | $\theta$ | $\theta_{low}$ | $\theta_{upp}$ | R     | R.low | R.upp | b2    | b2.lo<br>w | b2.up<br>p | a2      | a2.low  | a2.upp  |
|--------------|----------|-----------|-----|----------|----------------|----------------|-------|-------|-------|-------|------------|------------|---------|---------|---------|
| An. funestus | Indoors  | 2016-08   | 65  | 5.25     | 4.51           | 5.99           | 0.21  | 0.05  | 0.38  | 0.17  | 0.00       | 0.34       | -0.01   | -0.26   | 0.23    |
| An. funestus | Indoors  | 2016-09   | 156 | 1.82     | 1.54           | 2.09           | 0.35  | 0.24  | 0.46  | -0.06 | -0.20      | 0.07       | 0.25    | 0.14    | 0.36    |
| An. funestus | Indoors  | 2016-10   | 88  | 3.17     | 2.79           | 3.56           | 0.33  | 0.18  | 0.48  | 0.15  | -0.05      | 0.34       | 0.28    | 0.03    | 0.52    |
| An. funestus | Indoors  | 2016-11   | 108 | 2.07     | 1.70           | 2.43           | 0.35  | 0.23  | 0.47  | 0.17  | 0.06       | 0.29       | 0.08    | -0.11   | 0.27    |
| An. funestus | Indoors  | 2017-01   | 24  | 0.38     | -0.92          | 1.69           | 0.17  | -0.09 | 0.43  | -0.32 | -0.64      | 0.01       | -0.11   | -0.45   | 0.23    |
| An. funestus | Indoors  | 2017-02   | 2   | -5.23    | -19.15         | 8.70           | -2.40 | NA    | NA    | 0.00  | -27.58     | 27.58      | -101.95 | -101.95 | -101.95 |
| An. funestus | Indoors  | 2017-03   | 8   | 8.04     | 7.11           | 8.98           | 0.49  | 0.22  | 0.75  | -0.22 | -0.75      | 0.31       | -0.27   | -0.90   | 0.35    |
| An. funestus | Indoors  | 2017-04   | 12  | 4.39     | 3.77           | 5.00           | 0.48  | 0.10  | 0.86  | 0.05  | -0.43      | 0.52       | 0.46    | 0.02    | 0.90    |
| An. funestus | Indoors  | 2017-05   | 15  | 3.29     | 1.59           | 4.98           | 0.10  | -0.32 | 0.52  | 13.88 | 12.33      | 15.44      | 1.18    | 0.59    | 1.77    |
| An. funestus | Outdoors | 2016-06   | 12  | 0.04     | -0.48          | 0.56           | 0.56  | 0.21  | 0.91  | -0.13 | -0.72      | 0.46       | 0.49    | 0.08    | 0.90    |
| An. funestus | Outdoors | 2016-07   | 20  | 3.99     | 3.70           | 4.29           | 0.80  | 0.69  | 0.90  | -0.03 | -0.17      | 0.11       | 0.40    | 0.13    | 0.67    |
| An. funestus | Outdoors | 2016-08   | 30  | 1.20     | 0.92           | 1.48           | 0.70  | 0.54  | 0.86  | -0.03 | -0.21      | 0.15       | 0.39    | 0.16    | 0.62    |
| An. funestus | Outdoors | 2016-09   | 68  | 0.31     | 0.15           | 0.47           | 0.81  | 0.75  | 0.86  | -0.04 | -0.11      | 0.03       | 0.41    | 0.27    | 0.55    |
| An. funestus | Outdoors | 2016-10   | 30  | -0.74    | -0.99          | -0.49          | 0.78  | 0.69  | 0.88  | -0.02 | -0.15      | 0.12       | 0.36    | 0.16    | 0.57    |
| An. funestus | Outdoors | 2016-11   | 39  | 0.64     | 0.40           | 0.88           | 0.77  | 0.69  | 0.84  | 0.03  | -0.08      | 0.15       | 0.30    | 0.10    | 0.49    |
| An. funestus | Outdoors | 2017-01   | 13  | 0.00     | -0.31          | 0.32           | 0.84  | 0.76  | 0.93  | 0.03  | -0.08      | 0.14       | 0.47    | 0.22    | 0.72    |
| An. funestus | Outdoors | 2017-02   | 2   | -0.94    | -1.14          | -0.74          | 0.98  | 0.98  | 0.98  | 0.00  | -0.01      | 0.01       | 0.94    | NA      | NA      |
| An. funestus | Outdoors | 2017-03   | 3   | 1.78     | 0.21           | 3.36           | 0.35  | -0.16 | 0.87  | -2.08 | -2.57      | -1.60      | 0.06    | -2.50   | 2.63    |
| An. funestus | Outdoors | 2017-04   | 1   | 5.23     | 5.23           | 5.23           | 1.00  | 1.00  | 1.00  | 0.00  | 0.00       | 0.00       | 1.00    | 1.00    | 1.00    |
| An. funestus | Outdoors | 2017-05   | 5   | 0.36     | 0.13           | 0.59           | 0.96  | 0.93  | 0.98  | 0.01  | -0.02      | 0.03       | 0.84    | 0.74    | 0.94    |
| An. gambiae  | Indoors  | 2016-06   | 189 | 1.53     | 1.29           | 1.78           | 0.37  | 0.28  | 0.47  | 0.14  | 0.03       | 0.25       | 0.17    | 0.06    | 0.28    |
| An. gambiae  | Indoors  | 2016-07   | 123 | 3.06     | 2.79           | 3.34           | 0.42  | 0.30  | 0.53  | 0.24  | 0.13       | 0.35       | 0.15    | -0.04   | 0.33    |
| An. gambiae  | Indoors  | 2016-08   | 234 | 2.04     | 1.75           | 2.32           | 0.28  | 0.18  | 0.37  | 0.11  | -0.04      | 0.26       | 0.25    | 0.12    | 0.39    |
| An. gambiae  | Indoors  | 2016-09   | 408 | 1.12     | 0.93           | 1.30           | 0.31  | 0.24  | 0.39  | -0.04 | -0.15      | 0.07       | 0.28    | 0.22    | 0.35    |
| An. gambiae  | Indoors  | 2016-10   | 185 | 2.19     | 1.91           | 2.47           | 0.32  | 0.21  | 0.42  | 0.21  | 0.07       | 0.35       | 0.23    | 0.04    | 0.42    |

| Species        | Location | YearMonth | n   | $\theta$ | $\theta_{low}$ | $\theta_{upp}$ | R    | R.low | R.upp | b2    | b2.lo<br>w | b2.up<br>p | a2    | a2.low | a2.upp |
|----------------|----------|-----------|-----|----------|----------------|----------------|------|-------|-------|-------|------------|------------|-------|--------|--------|
| An. gambiae    | Indoors  | 2016-11   | 222 | 1.49     | 1.12           | 1.85           | 0.24 | 0.15  | 0.33  | 0.15  | 0.06       | 0.25       | 0.10  | -0.06  | 0.26   |
| An. gambiae    | Indoors  | 2017-01   | 313 | 4.01     | 3.77           | 4.25           | 0.31 | 0.24  | 0.38  | 0.19  | 0.12       | 0.26       | 0.08  | -0.04  | 0.21   |
| An. gambiae    | Indoors  | 2017-02   | 318 | 1.28     | 1.07           | 1.48           | 0.34 | 0.27  | 0.42  | -0.09 | -0.18      | 0.00       | 0.16  | 0.08   | 0.24   |
| An. gambiae    | Indoors  | 2017-03   | 350 | 1.35     | 1.15           | 1.56           | 0.32 | 0.25  | 0.40  | 0.07  | -0.02      | 0.17       | 0.19  | 0.12   | 0.27   |
| An. gambiae    | Indoors  | 2017-04   | 407 | 1.56     | 1.43           | 1.70           | 0.43 | 0.36  | 0.49  | -0.02 | -0.10      | 0.06       | 0.27  | 0.20   | 0.33   |
| An. gambiae    | Indoors  | 2017-05   | 418 | 2.18     | 2.01           | 2.35           | 0.36 | 0.29  | 0.42  | 0.05  | -0.02      | 0.12       | 0.18  | 0.11   | 0.25   |
| An. gambiae    | Outdoors | 2016-06   | 157 | 1.47     | 1.34           | 1.59           | 0.71 | 0.64  | 0.78  | 0.05  | -0.03      | 0.13       | 0.37  | 0.29   | 0.46   |
| An. gambiae    | Outdoors | 2016-07   | 115 | 1.84     | 1.70           | 1.98           | 0.75 | 0.68  | 0.81  | 0.03  | -0.06      | 0.12       | 0.35  | 0.24   | 0.46   |
| An. gambiae    | Outdoors | 2016-08   | 124 | 0.22     | 0.08           | 0.35           | 0.72 | 0.64  | 0.79  | 0.07  | -0.02      | 0.16       | 0.41  | 0.30   | 0.51   |
| An. gambiae    | Outdoors | 2016-09   | 224 | 0.42     | 0.34           | 0.50           | 0.83 | 0.80  | 0.86  | -0.01 | -0.05      | 0.03       | 0.49  | 0.42   | 0.57   |
| An. gambiae    | Outdoors | 2016-10   | 83  | -0.31    | -0.44          | -0.18          | 0.83 | 0.80  | 0.87  | 0.03  | -0.02      | 0.08       | 0.46  | 0.35   | 0.58   |
| An. gambiae    | Outdoors | 2016-11   | 206 | 0.75     | 0.65           | 0.85           | 0.78 | 0.75  | 0.81  | -0.01 | -0.06      | 0.04       | 0.33  | 0.25   | 0.41   |
| An. gambiae    | Outdoors | 2017-01   | 152 | 1.98     | 1.86           | 2.10           | 0.78 | 0.74  | 0.81  | -0.08 | -0.14      | -0.03      | 0.32  | 0.22   | 0.42   |
| An. gambiae    | Outdoors | 2017-02   | 184 | 1.17     | 1.08           | 1.27           | 0.81 | 0.77  | 0.85  | -0.07 | -0.11      | -0.02      | 0.44  | 0.35   | 0.52   |
| An. gambiae    | Outdoors | 2017-03   | 225 | -0.12    | -0.23          | -0.01          | 0.73 | 0.70  | 0.77  | 0.04  | -0.02      | 0.10       | 0.21  | 0.12   | 0.29   |
| An. gambiae    | Outdoors | 2017-04   | 310 | 1.13     | 1.06           | 1.19           | 0.84 | 0.81  | 0.86  | -0.06 | -0.09      | -0.02      | 0.50  | 0.44   | 0.57   |
| An. gambiae    | Outdoors | 2017-05   | 240 | 0.09     | -0.01          | 0.20           | 0.73 | 0.70  | 0.77  | 0.04  | -0.01      | 0.09       | 0.24  | 0.15   | 0.32   |
| An. pharoensis | Indoors  | 2016-06   | 40  | -2.77    | -2.95          | -2.59          | 0.84 | 0.78  | 0.91  | 0.11  | 0.01       | 0.20       | 0.51  | 0.34   | 0.67   |
| An. pharoensis | Indoors  | 2016-07   | 27  | -2.54    | -2.86          | -2.22          | 0.67 | 0.49  | 0.84  | 0.09  | -0.09      | 0.27       | 0.32  | 0.11   | 0.54   |
| An. pharoensis | Indoors  | 2016-08   | 27  | -3.05    | -3.27          | -2.82          | 0.74 | 0.54  | 0.93  | 0.11  | 0.02       | 0.20       | 0.61  | 0.42   | 0.81   |
| An. pharoensis | Indoors  | 2016-09   | 53  | -6.44    | -6.79          | -6.10          | 0.47 | 0.29  | 0.64  | -0.23 | -0.39      | -0.06      | 0.29  | 0.00   | 0.58   |
| An. pharoensis | Indoors  | 2016-10   | 54  | -6.15    | -6.49          | -5.81          | 0.49 | 0.33  | 0.65  | 0.06  | -0.08      | 0.20       | 0.18  | -0.01  | 0.36   |
| An. pharoensis | Indoors  | 2016-11   | 17  | -1.44    | -2.35          | -0.53          | 0.35 | 0.10  | 0.60  | -0.14 | -0.62      | 0.35       | -0.26 | -0.61  | 0.09   |
| An. pharoensis | Indoors  | 2017-01   | 38  | -3.45    | -3.79          | -3.11          | 0.51 | 0.31  | 0.72  | 0.34  | 0.13       | 0.56       | 0.41  | 0.01   | 0.80   |
| An. pharoensis | Indoors  | 2017-02   | 11  | -3.85    | -4.60          | -3.10          | 0.45 | 0.09  | 0.82  | 0.26  | -0.03      | 0.55       | 0.25  | -0.48  | 0.97   |

| Species        | Location | YearMonth | n  | $\theta$ | $\theta_{low}$ | $\theta_{upp}$ | R    | R.low | R.upp | b2    | b2.lo<br>w | b2.up<br>p | a2   | a2.low | a2.upp |
|----------------|----------|-----------|----|----------|----------------|----------------|------|-------|-------|-------|------------|------------|------|--------|--------|
| An. pharoensis | Indoors  | 2017-03   | 8  | -5.50    | -6.30          | -4.69          | 0.27 | -0.34 | 0.89  | 3.79  | 2.44       | 5.15       | 1.11 | 0.50   | 1.71   |
| An. pharoensis | Indoors  | 2017-04   | 11 | -5.45    | -6.22          | -4.68          | 0.47 | 0.16  | 0.79  | -0.07 | -0.48      | 0.33       | 0.06 | -0.34  | 0.45   |
| An. pharoensis | Indoors  | 2017-05   | 59 | -6.99    | -7.57          | -6.42          | 0.26 | 0.07  | 0.45  | 0.04  | -0.30      | 0.38       | 0.29 | -0.01  | 0.60   |
| An. pharoensis | Outdoors | 2016-06   | 82 | -2.96    | -3.09          | -2.82          | 0.81 | 0.76  | 0.87  | 0.09  | 0.01       | 0.17       | 0.45 | 0.35   | 0.56   |
| An. pharoensis | Outdoors | 2016-07   | 69 | -3.68    | -3.79          | -3.56          | 0.88 | 0.83  | 0.93  | 0.11  | 0.05       | 0.18       | 0.63 | 0.50   | 0.76   |
| An. pharoensis | Outdoors | 2016-08   | 49 | -3.07    | -3.26          | -2.89          | 0.81 | 0.74  | 0.88  | 0.14  | 0.05       | 0.24       | 0.43 | 0.26   | 0.60   |
| An. pharoensis | Outdoors | 2016-09   | 74 | -4.36    | -4.46          | -4.26          | 0.84 | 0.75  | 0.93  | 0.18  | 0.07       | 0.30       | 0.72 | 0.59   | 0.84   |
| An. pharoensis | Outdoors | 2016-10   | 50 | -4.05    | -4.36          | -3.75          | 0.58 | 0.44  | 0.71  | 0.15  | -0.02      | 0.32       | 0.17 | -0.07  | 0.40   |
| An. pharoensis | Outdoors | 2016-11   | 47 | -2.96    | -3.14          | -2.78          | 0.80 | 0.70  | 0.89  | 0.15  | 0.03       | 0.26       | 0.49 | 0.32   | 0.66   |
| An. pharoensis | Outdoors | 2017-01   | 45 | -4.78    | -4.89          | -4.66          | 0.91 | 0.85  | 0.97  | 0.13  | 0.03       | 0.23       | 0.76 | 0.59   | 0.92   |
| An. pharoensis | Outdoors | 2017-02   | 6  | -3.67    | -4.15          | -3.19          | 0.81 | 0.61  | 1.01  | 0.28  | 0.08       | 0.48       | 0.47 | -0.18  | 1.13   |
| An. pharoensis | Outdoors | 2017-03   | 6  | -5.40    | -5.47          | -5.32          | 0.99 | 0.99  | 1.00  | 0.00  | 0.00       | 0.00       | 0.98 | 0.97   | 0.99   |
| An. pharoensis | Outdoors | 2017-04   | 10 | -1.36    | -1.96          | -0.76          | 0.64 | 0.42  | 0.86  | 0.23  | -0.03      | 0.49       | 0.11 | -0.45  | 0.66   |
| An. pharoensis | Outdoors | 2017-05   | 29 | -3.79    | -3.99          | -3.59          | 0.83 | 0.72  | 0.94  | 0.15  | 0.00       | 0.30       | 0.57 | 0.38   | 0.76   |

YearMonth Year and Month of collection

n Number of specimens analyzed

$\theta$  the sample median direction in radians measured clockwise

$\theta_{low}$  theta low confidence interval 95 %

$\theta_{upp}$  theta high confidence interval 95%

R concentration, the sample mean resultant length,  $R \in [0,1]$ , when data spread evenly around the circle  $R=0$ , and when all data points are clustered at the same point  $R=1$

R low R low confidence interval 95 %

R upp R high confidence interval 95%

b2 Second sine moment

b2 low b2 low confidence interval 95 %

b2 upp b2 high confidence interval 95%

a2 Second cosine moment

a2 low a2 low confidence interval 95 %

a2 upp a2 high confidence interval 95%

**Table S2.** Summary of circular statistics for each species, location and site.

| Species      | Site           | Location | n    | $\theta$ | $\theta_{low}$ | $\theta_{upp}$ | R     | R.low | R.upp | b2     | b2.low | b2.upp | a2    | a2.low | a2.upp |
|--------------|----------------|----------|------|----------|----------------|----------------|-------|-------|-------|--------|--------|--------|-------|--------|--------|
| An. gambiae  | Gbanikola      | Indoors  | 618  | 0.82     | 0.71           | 0.94           | 0.40  | 0.35  | 0.46  | 0.08   | 0.00   | 0.15   | 0.28  | 0.22   | 0.33   |
| An. gambiae  | Gbanikola      | Outdoors | 428  | 0.17     | 0.10           | 0.24           | 0.74  | 0.71  | 0.78  | 0.07   | 0.03   | 0.11   | 0.37  | 0.31   | 0.43   |
| An. gambiae  | Ile_des_Singes | Indoors  | 447  | 1.98     | 1.89           | 2.08           | 0.60  | 0.55  | 0.64  | -0.01  | -0.06  | 0.05   | 0.23  | 0.17   | 0.29   |
| An. gambiae  | Ile_des_Singes | Outdoors | 253  | 0.54     | 0.45           | 0.63           | 0.78  | 0.75  | 0.82  | 0.01   | -0.04  | 0.05   | 0.39  | 0.31   | 0.46   |
| An. gambiae  | Ouango         | Indoors  | 1394 | 1.60     | 1.46           | 1.74           | 0.24  | 0.20  | 0.28  | 0.04   | -0.02  | 0.10   | 0.19  | 0.16   | 0.23   |
| An. gambiae  | Ouango         | Outdoors | 968  | 0.88     | 0.84           | 0.93           | 0.79  | 0.77  | 0.80  | -0.05  | -0.07  | -0.03  | 0.37  | 0.33   | 0.40   |
| An. gambiae  | PK10           | Indoors  | 708  | 3.33     | 3.19           | 3.48           | 0.33  | 0.28  | 0.38  | 0.20   | 0.14   | 0.25   | 0.16  | 0.08   | 0.24   |
| An. gambiae  | PK10           | Outdoors | 371  | 1.33     | 1.25           | 1.41           | 0.75  | 0.72  | 0.78  | -0.05  | -0.09  | 0.00   | 0.31  | 0.25   | 0.38   |
| An. coluzzii | Gbanikola      | Indoors  | 347  | -0.32    | -0.60          | -0.04          | 0.23  | 0.15  | 0.31  | -0.06  | -0.22  | 0.11   | 0.28  | 0.18   | 0.38   |
| An. coluzzii | Gbanikola      | Outdoors | 228  | 0.79     | 0.68           | 0.90           | 0.66  | 0.59  | 0.72  | 0.12   | 0.05   | 0.19   | 0.38  | 0.29   | 0.46   |
| An. coluzzii | Ile_des_Singes | Indoors  | 122  | 1.16     | 0.98           | 1.33           | 0.59  | 0.49  | 0.69  | 0.00   | -0.11  | 0.11   | 0.31  | 0.20   | 0.42   |
| An. coluzzii | Ile_des_Singes | Outdoors | 83   | -0.13    | -0.31          | 0.05           | 0.70  | 0.62  | 0.79  | -0.07  | -0.17  | 0.02   | 0.29  | 0.15   | 0.43   |
| An. coluzzii | Ouango         | Indoors  | 124  | 6.27     | 5.47           | 7.06           | 0.15  | 0.04  | 0.26  | 0.00   | -0.23  | 0.23   | -0.15 | -0.27  | -0.03  |
| An. coluzzii | Ouango         | Outdoors | 66   | 1.45     | 1.28           | 1.62           | 0.78  | 0.72  | 0.85  | -0.04  | -0.12  | 0.05   | 0.37  | 0.23   | 0.52   |
| An. coluzzii | PK10           | Indoors  | 16   | 8.56     | 5.00           | 12.12          | -0.07 | -0.38 | 0.24  | -22.46 | -23.78 | -21.13 | -1.33 | -2.37  | -0.29  |
| An. coluzzii | PK10           | Outdoors | 5    | 0.68     | 0.01           | 1.34           | 0.75  | 0.66  | 0.84  | 0.01   | -0.40  | 0.42   | 0.07  | -0.25  | 0.39   |
| An. funestus | Gbanikola      | Indoors  | 114  | 0.55     | 0.37           | 0.72           | 0.58  | 0.47  | 0.69  | -0.03  | -0.16  | 0.09   | 0.40  | 0.29   | 0.52   |
| An. funestus | Gbanikola      | Outdoors | 79   | 0.19     | 0.04           | 0.34           | 0.78  | 0.70  | 0.85  | 0.01   | -0.07  | 0.09   | 0.44  | 0.32   | 0.56   |
| An. funestus | Ile_des_Singes | Indoors  | 102  | 0.89     | 0.70           | 1.09           | 0.62  | 0.53  | 0.71  | -0.05  | -0.15  | 0.04   | 0.21  | 0.08   | 0.34   |
| An. funestus | Ile_des_Singes | Outdoors | 37   | -1.10    | -1.33          | -0.87          | 0.79  | 0.72  | 0.86  | 0.02   | -0.09  | 0.12   | 0.34  | 0.16   | 0.52   |
| An. funestus | Ouango         | Indoors  | 145  | 7.23     | 6.37           | 8.09           | 0.13  | 0.03  | 0.23  | -0.27  | -0.55  | 0.01   | -0.21 | -0.35  | -0.07  |
| An. funestus | Ouango         | Outdoors | 67   | 1.32     | 1.15           | 1.49           | 0.78  | 0.72  | 0.85  | -0.02  | -0.11  | 0.08   | 0.38  | 0.25   | 0.51   |
| An. funestus | PK10           | Indoors  | 190  | 5.99     | 5.73           | 6.25           | 0.37  | 0.28  | 0.46  | 0.30   | 0.22   | 0.39   | 0.08  | -0.11  | 0.27   |

|                |                |          |     |       |       |       |      |      |      |       |       |      |      |       |      |
|----------------|----------------|----------|-----|-------|-------|-------|------|------|------|-------|-------|------|------|-------|------|
| An. funestus   | PK10           | Outdoors | 40  | 2.18  | 1.91  | 2.44  | 0.68 | 0.55 | 0.81 | -0.01 | -0.14 | 0.11 | 0.30 | 0.11  | 0.49 |
| An. pharoensis | Gbanikola      | Indoors  | 212 | -4.27 | -4.41 | -4.12 | 0.54 | 0.45 | 0.62 | 0.06  | -0.05 | 0.16 | 0.36 | 0.26  | 0.46 |
| An. pharoensis | Gbanikola      | Outdoors | 315 | -3.82 | -3.89 | -3.75 | 0.81 | 0.78 | 0.85 | 0.13  | 0.08  | 0.17 | 0.52 | 0.45  | 0.58 |
| An. pharoensis | Ile_des_Singes | Indoors  | 13  | -4.86 | -5.52 | -4.20 | 0.52 | 0.25 | 0.79 | 0.18  | -0.14 | 0.50 | 0.09 | -0.39 | 0.56 |
| An. pharoensis | Ile_des_Singes | Outdoors | 13  | -2.24 | -2.79 | -1.69 | 0.58 | 0.29 | 0.86 | 0.43  | 0.12  | 0.74 | 0.31 | -0.40 | 1.01 |
| An. pharoensis | Ouango         | Indoors  | 103 | -4.91 | -5.26 | -4.56 | 0.33 | 0.19 | 0.47 | 0.00  | -0.18 | 0.19 | 0.26 | 0.12  | 0.40 |
| An. pharoensis | Ouango         | Outdoors | 114 | -3.36 | -3.49 | -3.24 | 0.79 | 0.73 | 0.84 | 0.18  | 0.11  | 0.25 | 0.42 | 0.30  | 0.54 |
| An. pharoensis | PK10           | Indoors  | 17  | -1.79 | -2.55 | -1.03 | 0.38 | 0.07 | 0.68 | 0.12  | -0.21 | 0.46 | 0.14 | -0.26 | 0.55 |
| An. pharoensis | PK10           | Outdoors | 25  | -3.66 | -3.89 | -3.43 | 0.79 | 0.63 | 0.94 | 0.24  | 0.01  | 0.46 | 0.58 | 0.30  | 0.85 |

*Site* Site of collection across Bangui  
*n* Number of specimens analyzed  
 $\theta$  the sample median direction in radians measured clockwise  
 *$\theta$  low* theta low confidence interval 95 %  
 *$\theta$  upp* theta high confidence interval 95%  
*R* concentration, the sample mean resultant length,  $R \in [0,1]$ , when data spread evenly around the circle  $R=0$ , and when all data points are clustered at the same point  $R=1$   
*R low* R low confidence interval 95 %  
*R upp* R high confidence interval 95%  
*b2* Second sine moment  
*b2 low* b2 low confidence interval 95 %  
*b2 upp* b2 high confidence interval 95%  
*a2* Second cosine moment  
*a2 low* a2 low confidence interval 95 %  
*a2 upp* a2 high confidence interval 95%

**Table S3.** Summary of circular statistic parameters for each species by location.

| Species        | Location | n    | $\theta$ | $\theta_{low}$ | $\theta_{upp}$ | R    | R.low | R.upp | b2    | b2.low | b2.upp | a2   | a2.low | a2.upp |
|----------------|----------|------|----------|----------------|----------------|------|-------|-------|-------|--------|--------|------|--------|--------|
| An. coluzzii   | Indoors  | 609  | 0.94     | 0.74           | 1.14           | 0.24 | 0.19  | 0.30  | 0.03  | -0.07  | 0.14   | 0.25 | 0.19   | 0.31   |
| An. coluzzii   | Outdoors | 382  | 0.71     | 0.63           | 0.80           | 0.69 | 0.64  | 0.73  | 0.05  | 0.00   | 0.10   | 0.35 | 0.29   | 0.42   |
| An. funestus   | Indoors  | 551  | 2.90     | 2.72           | 3.08           | 0.30 | 0.24  | 0.36  | 0.11  | 0.04   | 0.18   | 0.18 | 0.11   | 0.26   |
| An. funestus   | Outdoors | 223  | 0.64     | 0.53           | 0.74           | 0.74 | 0.69  | 0.78  | 0.00  | -0.06  | 0.06   | 0.33 | 0.25   | 0.41   |
| An. gambiae    | Indoors  | 3167 | 1.89     | 1.82           | 1.95           | 0.33 | 0.31  | 0.36  | 0.08  | 0.05   | 0.11   | 0.21 | 0.18   | 0.23   |
| An. gambiae    | Outdoors | 2020 | 0.77     | 0.74           | 0.81           | 0.77 | 0.75  | 0.78  | -0.01 | -0.03  | 0.00   | 0.34 | 0.32   | 0.37   |
| An. pharoensis | Indoors  | 345  | -4.33    | -4.47          | -4.20          | 0.47 | 0.40  | 0.53  | 0.05  | -0.04  | 0.13   | 0.30 | 0.22   | 0.38   |
| An. pharoensis | Outdoors | 467  | -3.67    | -3.73          | -3.61          | 0.80 | 0.77  | 0.83  | 0.16  | 0.12   | 0.20   | 0.49 | 0.43   | 0.55   |

n Number of specimens analyzed

$\theta$  the sample median direction in radians measured clockwise

$\theta_{low}$  theta low confidence interval 95 %

$\theta_{upp}$  theta high confidence interval 95%

R concentration, the sample mean resultant length,  $R \in [0,1]$ , when data spread evenly around the circle  $R = 0$ , and when all data points are clustered at the same point  $R=1$

R low R low confidence interval 95 %

R upp R high confidence interval 95%

b2 Second sine moment

b2 low b2 low confidence interval 95 %

b2 upp b2 high confidence interval 95%

a2 Second cosine moment

a2 low a2 low confidence interval 95 %

a2 upp a2 high confidence interval 95%

**Table S4.** Uniformity tests for each species and location.

| <b>Species</b> | <b>Location</b> | <b>n</b> | <b>Rayleigh</b> | <b>Kuiper</b> | <b>Watson</b> | <b>Rao</b> |
|----------------|-----------------|----------|-----------------|---------------|---------------|------------|
| An. coluzzii   | Indoors         | 609      | 0.00            | 0.00          | 0.00          | 0.00       |
| An. coluzzii   | Outdoors        | 382      | 0.00            | 0.00          | 0.00          | 0.00       |
| An. funestus   | Indoors         | 551      | 0.00            | 0.00          | 0.00          | 0.00       |
| An. funestus   | Outdoors        | 223      | 0.00            | 0.00          | 0.00          | 0.00       |
| An. gambiae    | Indoors         | 3167     | 0.00            | 0.00          | 0.00          | 0.00       |
| An. gambiae    | Outdoors        | 2020     | 0.00            | 0.00          | 0.00          | 0.00       |
| An. pharoensis | Indoors         | 345      | 0.00            | 0.00          | 0.00          | 0.00       |
| An. pharoensis | Outdoors        | 467      | 0.00            | 0.00          | 0.00          | 0.00       |

n            Number of mosquitoes collected  
Rayleigh        p value for the uniformity Rayleigh test  
Kuiper        p value for the uniformity Kuiper test  
Watson        p value for the uniformity Watson test  
Rao        p value for the uniformity Rao test

**Table S5.** Reflective Symmetry Test by species and location

| <b>Species</b> | <b>Location</b> | <b>n</b> | <b>z</b> | <b>P</b> |
|----------------|-----------------|----------|----------|----------|
| An. coluzzii   | Indoors         | 609      | 0.74     | 0.46     |
| An. coluzzii   | Outdoors        | 382      | 1.78     | 0.07     |
| An. funestus   | Indoors         | 551      | 3.12     | 0.00     |
| An. funestus   | Outdoors        | 223      | 0.02     | 0.98     |
| An. gambiae    | Indoors         | 3167     | 4.95     | 0.00     |
| An. gambiae    | Outdoors        | 2020     | 1.47     | 0.14     |
| An. pharoensis | Indoors         | 345      | 1.15     | 0.25     |
| An. pharoensis | Outdoors        | 467      | 7.12     | 0.00     |

n      number of mosquitoes

z      unknown central direction based on the studentized statistic

P      p value of Reflective Symmetry Test



**Table S6.** Fisher's non-parametric test for a common median direction

| Species           | Location | Nocturnal species |          | A. gambiae | A. coluzzii | A. funestus | A. pharoensis |        |
|-------------------|----------|-------------------|----------|------------|-------------|-------------|---------------|--------|
|                   |          | Outdoor           | Indoor   | Indoor     | Indoor      | Indoor      | Outdoor       | Indoor |
| Nocturnal species | Outdoor  |                   | 0        | 0.893      | 0.0001      | 0           | 0             |        |
| A. gambiae        | Indoor   | 55.7987           |          | 0.003      | 0.0144      | 0           | 0             |        |
| A. coluzzii       | Indoor   | 0.018             | 8.7885   |            | 0           | 0           | 0             |        |
| A. funestus       | Indoor   | 15.8649           | 5.985    | 174.263    |             | 0           | 0             |        |
| A. pharoensis     | Outdoor  | 362.3028          | 371.8034 | 129.4856   | 196.7383    |             | 0.228         |        |
|                   | Indoor   | 107.4398          | 107.6439 | 87.7287    | 129.4856    | 1.457       |               |        |

Below the main diagonal    Pg statistic  
 Above the main diagonal    P value

**Table S7.** Wallraff's non-parametric test for a common concentration parameters

|                   |          | Nocturnal species | A. gambiae | A. coluzzii | A. funestus | A. pharoensis |        |
|-------------------|----------|-------------------|------------|-------------|-------------|---------------|--------|
|                   | Location | Outdoor           | Indoor     | Indoor      | Indoor      | Outdoor       | Indoor |
| Nocturnal species | Outdoor  |                   | 0          | 0           | 0           | 0             | 0.002  |
| A. gambiae        | Indoor   | 454.224           |            | 0.159       | 0.192       | 0             | 0      |
| A. coluzzii       | Indoor   | 169.907           | 1.986      |             | 0.894       | 0             | 0      |
| A. funestus       | Indoor   | 181.247           | 1.705      | 0.018       |             | 0             | 0      |
| A. pharoensis     | Outdoor  | 141.864           | 378.46     | 249.634     | 250.067     |               | 0.001  |
|                   | Indoor   | 9.61              | 93.089     | 77.398      | 71.531      | 11.468        |        |

Below the main diagonal    Chi-squared statistic  
 Above the main diagonal    P value

**Table S8.** Summary of statistics for fitting von Misses Distribution by species and location

| <b>Species</b>        | <b>Location</b> | <b>n</b> | <b>Kuiper</b> | <b>Rayleigh</b> | <b>Rao</b> | <b>Watson</b> |
|-----------------------|-----------------|----------|---------------|-----------------|------------|---------------|
| <b>An. coluzzii</b>   | Indoors         | 599      | 0.00          | 0.00            | 0.00       | 0.00          |
| <b>An. coluzzii</b>   | Outdoors        | 378      | 0.01          | 0.04            | 0.06       | 0.02          |
| <b>An. funestus</b>   | Indoors         | 541      | 0.00          | 0.00            | 0.16       | 0.00          |
| <b>An. funestus</b>   | Outdoors        | 212      | 0.27          | 0.66            | 0.28       | 0.46          |
| <b>An. gambiae</b>    | Indoors         | 3167     | 0.00          | 0.00            | 0.01       | 0.00          |
| <b>An. gambiae</b>    | Outdoors        | 2020     | 0.00          | 0.00            | 0.01       | 0.00          |
| <b>An. pharoensis</b> | Indoors         | 337      | 0.00          | 0.00            | 0.00       | 0.00          |
| <b>An. pharoensis</b> | Outdoors        | 445      | 0.00          | 0.00            | 0.00       | 0.00          |

n        Number of specimens tested ( limited to n>10)  
Kuiper    estimated p-value for the Kuiper test  
Rayleigh    estimated p-value for the Rayleigh test  
Rao        estimated p-value for the Rao spacing test  
Watson    estimated p-value for the Watson U2 test

**Table S9.** Summary of statistics for fitting Jones-Pesey Distribution by species and location

| Species        | Location | n    | maxLogLik | mu   | kappa | psi       | Kuiper | Rayleigh | Rao  | Watson |
|----------------|----------|------|-----------|------|-------|-----------|--------|----------|------|--------|
| An. coluzzii   | Indoors  | 599  | -1036.68  | 0.22 | 0.73  | -<br>3.25 | 0.10   | 0.70     | 0.10 | 0.10   |
| An. coluzzii   | Outdoors | 378  | -483.26   | 0.17 | 1.75  | -<br>0.29 | 0.20   | 0.40     | 0.20 | 0.10   |
| An. funestus   | Indoors  | 541  | -933.90   | 0.63 | 0.68  | -<br>1.83 | 0.10   | 0.30     | 0.40 | 0.10   |
| An. funestus   | Outdoors | 212  | -250.74   | 0.16 | 2.40  | 0.07      | 0.50   | 0.70     | 0.40 | 0.50   |
| An. gambiae    | Indoors  | 3167 | -5397.45  | 0.40 | 0.75  | -<br>1.81 | 0.10   | 0.20     | 0.30 | 0.10   |
| An. gambiae    | Outdoors | 2020 | -2234.20  | 0.20 | 3.24  | 0.17      | 0.20   | 0.40     | 0.10 | 0.10   |
| An. pharoensis | Indoors  | 337  | -511.60   | 5.05 | 1.20  | -<br>2.01 | 0.10   | 0.10     | 0.30 | 0.10   |
| An. pharoensis | Outdoors | 445  | -446.58   | 5.22 | 2.25  | -<br>0.37 | 0.10   | 0.10     | 0.10 | 0.10   |

n Number of specimens tested ( limited to  $n > 10$ )

maxLogLik maximum value of the the log-likelihood function

mu maximum likelihood estimates of  $\mu$

kappa maximum likelihood estimates of K

psi maximum likelihood estimates of  $\psi$

Kuiper estimated p-value for the Kuiper test

Rayleigh estimated p-value for the Rayleigh test

Rao estimated p-value for the Rao spacing test

Watson estimated p-value for the Watson U2 test

**Table S10.** Summary of statistics for fitting Inverse Batschelet Distribution by species and location

| Species        | Location | n    | maxLogLik | AIC      | BIC      | xi   | kappa | nu    | lambda | Kuiper | Rayleigh | Rao  | Watson |
|----------------|----------|------|-----------|----------|----------|------|-------|-------|--------|--------|----------|------|--------|
| An. coluzzii   | Indoors  | 599  | -1036.11  | 2080.22  | 2097.80  | 1.39 | 0.82  | 0.63  | 1.00   | 0.00   | 0.14     | 0.00 | 0.00   |
| An. coluzzii   | Outdoors | 378  | -482.21   | 972.42   | 988.16   | 0.48 | 1.83  | 0.20  | 0.20   | 0.00   | 0.98     | 0.00 | 0.00   |
| An. funestus   | Indoors  | 541  | -929.08   | 1866.16  | 1883.33  | 1.68 | 0.73  | 0.69  | 0.35   | 0.00   | 0.95     | 0.00 | 0.00   |
| An. funestus   | Outdoors | 212  | -250.55   | 509.11   | 522.53   | 0.15 | 2.41  | -0.01 | -0.10  | 0.00   | 0.95     | 0.00 | 0.00   |
| An. gambiae    | Indoors  | 3167 | -5377.30  | 10762.61 | 10786.85 | 1.45 | 0.80  | 0.64  | 0.49   | 0.00   | 0.44     | 0.00 | 0.00   |
| An. gambiae    | Outdoors | 2020 | -2229.42  | 4466.85  | 4489.29  | 0.09 | 3.08  | -0.08 | -0.24  | 0.00   | 0.88     | 0.00 | 0.00   |
| An. pharoensis | Indoors  | 337  | -514.65   | 1037.29  | 1052.57  | 0.24 | 1.35  | 0.79  | 1.00   | 0.00   | 0.61     | 0.00 | 0.00   |
| An. pharoensis | Outdoors | 445  | -380.64   | 769.28   | 785.68   | 0.70 | 2.58  | 1.00  | 0.50   | 0.00   | 0.02     | 0.00 | 0.00   |

n Number of specimens tested ( limited to n>10)  
maxLogLik maximum value of the the log-likelihood function  
AIC Akaike information criterion  
BIC Bayesian information criterion  
xi maximum likelihood estimates of  $\xi$   
kappa maximum likelihood estimates of K  
nu maximum likelihood estimates of  $\nu$   
lambda maximum likelihood estimates of  $\lambda$   
Kuiper estimated p-value for the Kuiper test  
Rayleigh estimated p-value for the Rayleigh test  
Rao estimated p-value for the Rao spacing test  
Watson estimated p-value for the Watson U2 test

**Table S11.** Best number of clusters per species, month and location

| Species        | Month   | Clusters Indoor | Clusters Outdoor |
|----------------|---------|-----------------|------------------|
| An. coluzzii   | 2016-06 | 3               | 5                |
| An. coluzzii   | 2016-07 | 2               | Na               |
| An. coluzzii   | 2016-08 | 3               | 4                |
| An. coluzzii   | 2016-09 | 3               | Na               |
| An. coluzzii   | 2016-05 | 6               | 4                |
| An. coluzzii   | 2016-10 | Na              | Na               |
| An. coluzzii   | 2016-11 | Na              | Na               |
| An. coluzzii   | 2017-01 | Na              | Na               |
| An. coluzzii   | 2017-02 | Na              | Na               |
| An. coluzzii   | 2017-03 | 2               | 2                |
| An. coluzzii   | 2017-04 | 5               | 5                |
| An. funestus   | 2016-06 | Na              | Na               |
| An. funestus   | 2016-07 | 3               | Na               |
| An. funestus   | 2016-08 | 1               | Na               |
| An. funestus   | 2016-09 | 3               | 4                |
| An. funestus   | 2016-05 | Na              | Na               |
| An. funestus   | 2016-10 | 3               | Na               |
| An. funestus   | 2016-11 | 3               | Na               |
| An. funestus   | 2017-01 | Na              | Na               |
| An. funestus   | 2017-02 | Na              | Na               |
| An. funestus   | 2017-03 | Na              | Na               |
| An. funestus   | 2017-04 | Na              | Na               |
| An. gambiae    | 2016-06 | 6               | 5                |
| An. gambiae    | 2016-07 | 3               | 4                |
| An. gambiae    | 2016-08 | 4               | 5                |
| An. gambiae    | 2016-09 | 4               | 5                |
| An. gambiae    | 2016-05 | 4               | 5                |
| An. gambiae    | 2016-10 | 3               | 2                |
| An. gambiae    | 2016-11 | 4               | 3                |
| An. gambiae    | 2017-01 | 4               | 3                |
| An. gambiae    | 2017-02 | 4               | 4                |
| An. gambiae    | 2017-03 | 4               | 4                |
| An. gambiae    | 2017-04 | 5               | 4                |
| An. pharoensis | 2016-06 | 6               | 3                |
| An. pharoensis | 2016-07 | Na              | 3                |
| An. pharoensis | 2016-08 | Na              | 3                |

| <b>Species</b>        | <b>Month</b> | <b>Clusters Indoor</b> | <b>Clusters Outdoor</b> |
|-----------------------|--------------|------------------------|-------------------------|
| <b>An. pharoensis</b> | 2016-09      | 3                      | 4                       |
| <b>An. pharoensis</b> | 2016-05      | 4                      | Na                      |
| <b>An. pharoensis</b> | 2016-10      | 5                      | 4                       |
| <b>An. pharoensis</b> | 2016-11      | Na                     | 5                       |
| <b>An. pharoensis</b> | 2017-01      | Na                     | 3                       |
| <b>An. pharoensis</b> | 2017-02      | Na                     | Na                      |
| <b>An. pharoensis</b> | 2017-03      | Na                     | Na                      |
| <b>An. pharoensis</b> | 2017-04      | Na                     | Na                      |

Na: When number of mosquitoes <40  
Best fitting number of clusters for Indoor and Outdoor collections

**Table S12.** Insecticide resistance status in Anopheles mosquitoes collected in Bangui

| Species             | Total | KDR-west |    |    | KDR-east |    |    |
|---------------------|-------|----------|----|----|----------|----|----|
|                     |       | RR       | RS | SS | RR       | RS | SS |
| <i>An. gambiae</i>  | 247   | 237      | 5  | 1  | 4        | 0  | 0  |
| <i>An. coluzzii</i> | 114   | 68       | 38 | 7  | 0        | 0  | 1  |

Abbreviations: RR homozygous resistant alleles; RS heterozygous resistant and susceptible alleles; SS homozygous susceptible alleles

The presence of the target-site L1014F (kdr-w) and L1014S (kdr-e) mutations was determined using the TaqMan assay, as described in Bass et al.<sup>1</sup> only in randomly selected *An. gambiae* and *An. coluzzii* specimens.



**Dataset S1 (separate file).** The mosquito biting events in Bangui Central African Republic.

- ID Identification for each mosquito
- Date Date of collection
- Sites Sites of collection in Bangui
- Species Taxonomic and molecular identification of Anopheles collected in Bangui
- Location Indoor or Outdoor
- Hour\_collection Hour of collection
- Feeding\_status Unfed or blood-fed
- P. falciparum Infection with P. falciparum
- kdr\_w Presence of the allele KDR, mutation West
- kdr\_e Presence of the allele KDR, mutation East
- Lat Latitude
- Long Longitude

## SI References

Sample References:

1. C. Bass et al., Detection of knockdown resistance (kdr) mutations in *Anopheles gambiae*: a comparison of two new high-throughput assays with existing methods. *Malaria journal* 6, 1-14 (2007).
